# Supplementary material for: Rapid evolution and biogeographic spread in a colorectal cancer
Source: PubMed Central journal article supplement (PMC6853914; doi:10.1038/s41467-019-12926-8), 2019-11-13
Supplement: 41467_2019_12926_MOESM1_ESM.pdf [file 41467_2019_12926_MOESM1_ESM.pdf]

**Rapid evolution and biogeographic spread in a colorectal cancer**

Joao M Alves<sup>1,2,3</sup>, Sonia Prado-Lopez<sup>1,2,3</sup>, Jose Manuel Cameselle-Teijeiro<sup>4,5</sup>, David Posada<sup>\*,1,2,3</sup>

1. Department of Biochemistry, Genetics and Immunology, University of Vigo, Spain.

2. Biomedical Research Center (CINBIO), University of Vigo, Spain.

3. Galicia Sur Health Research Institute, Vigo, Spain.

4. Department of Pathology, Clinical University Hospital, Galician Healthcare Service (SERGAS), Santiago de Compostela, Spain.

5. Medical Faculty, University of Santiago de Compostela, Santiago de Compostela, Spain

\* Corresponding author: dposada@uvigo.es

18 **Supplementary Note 1. Spatial distribution of bulk tumor samples**

19 To assess whether the biogeographical solution described in the main text was robust to  
20 changes in the geographical coordinates assigned to each tumor sample, we generated five 2D  
21 spatial matrices corresponding to alternative migration distances among the tumor samples  
22 (Supplementary fig. 4). Remarkably, three out of the five 2D matrices resulted in the same  
23 migration history as the one described in the main text. Interestingly, for matrix 3, in which the  
24 geographical locations of both colonic and hepatic lymph nodes were spaced far apart from the  
25 colon and liver, BayArea<sup>1</sup> inferred a biogeographic solution where the ancestral metastatic  
26 clone was located in hepatic lymph nodes. In addition, for matrix 5, in which the spatial  
27 distance between all organs was substantially reduced, BayArea inferred a migratory  
28 dissemination very similar to the one presented in the main text, but suggesting an earlier  
29 movement of metastatic clones in the liver to nearby hepatic lymph nodes.

30

31 **Supplementary Note 2. Inferring migration history at the sample level using MACHINA**

32 We additionally ran MACHINA<sup>2</sup> at the sample level, under parsimonious migration history mode,  
33 by setting each sampled location as a different anatomical site. Since eight primary tumor  
34 locations were sampled, all of them were tested in turn as potential primary anatomical sites.  
35 This resulted in a total of 30,924 migration histories. Focusing solely at the inferred histories  
36 where the primary anatomical site was assumed to be C3 (i.e., the primary anatomical site  
37 inferred using BayArea), 18 maximum parsimony histories (MP) were inferred. One of the 18  
38 inferred MP histories is fairly similar to the biogeographic history reconstructed with BayArea,  
39 although it suggests an early metastatic dissemination followed by a subsequent migration back  
40 to the primary tumor (L1 -> C1). Altogether, these MACHINA results seem rather inconclusive.

41

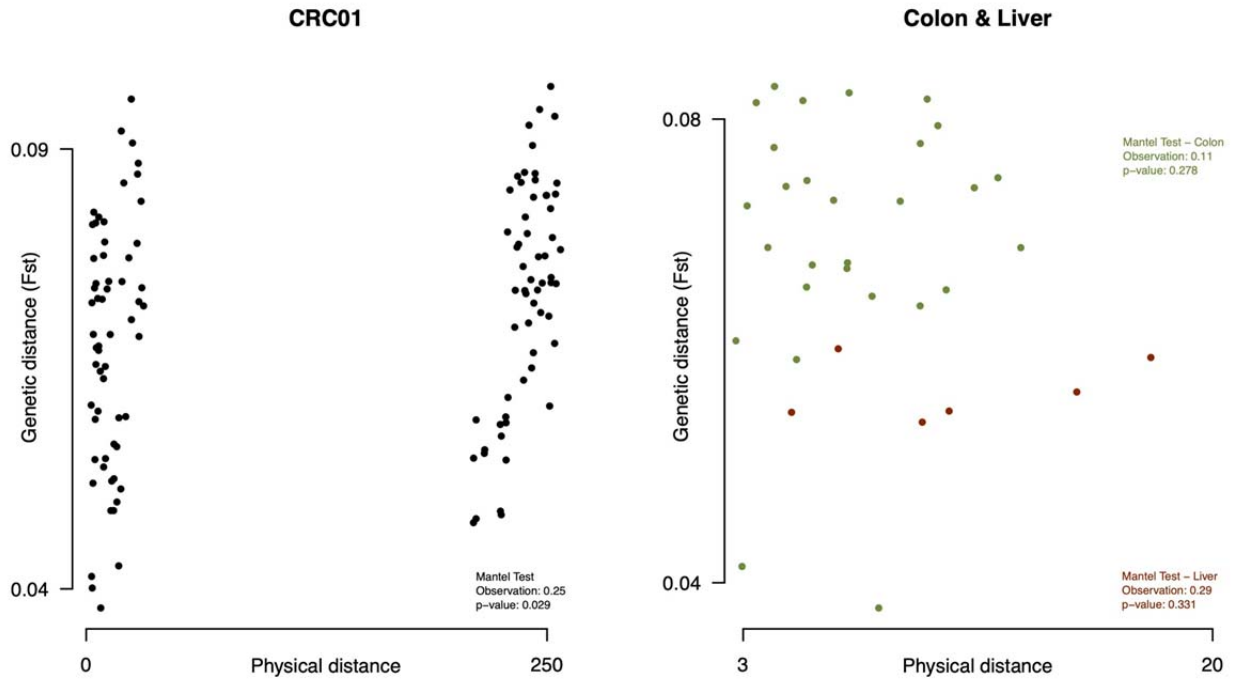

42  
 43 **Supplementary Figure 1. Overall and tissue-specific correlation between geographic distance**  
 44 **and genetic distance.** The geographic distance matrix consists of pairwise comparisons of the  
 45 spatial location of tumor samples in *Matrix 1*. The genetic distance matrix consists of pairwise  
 46 *Fst* estimates<sup>3</sup>. A Mantel test<sup>4</sup> was performed in R comparing the two distance matrices using  
 47 1000 replicates.

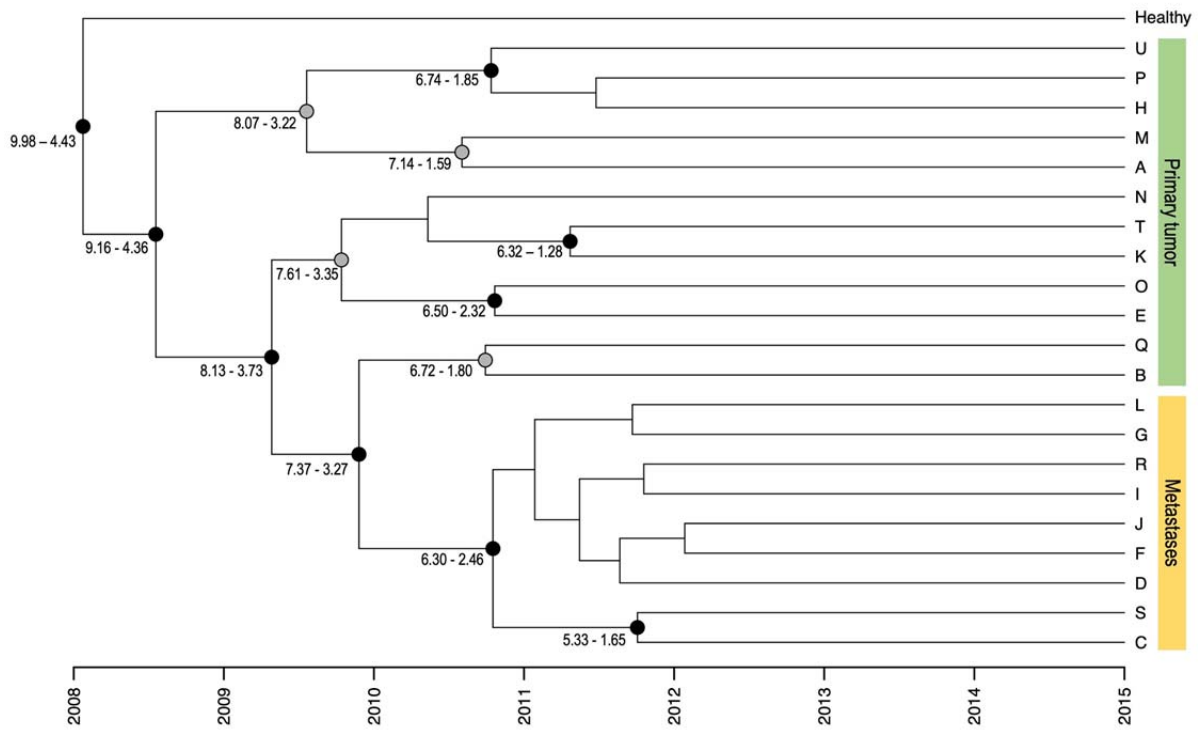

49  
 50 **Supplementary Figure 2. Uncertainty of the phylogenetic dating with \*BEAST.** Lower and  
 51 upper 95% HPD age estimates in years obtained from \*BEAST are shown for tree nodes with  
 52 posterior support > 0.5. Nodes with posterior probability values > 0.9 and > 0.5 are highlighted  
 53 with black and grey solid circles, respectively. Clone IDs are shown at the tips of the tree.

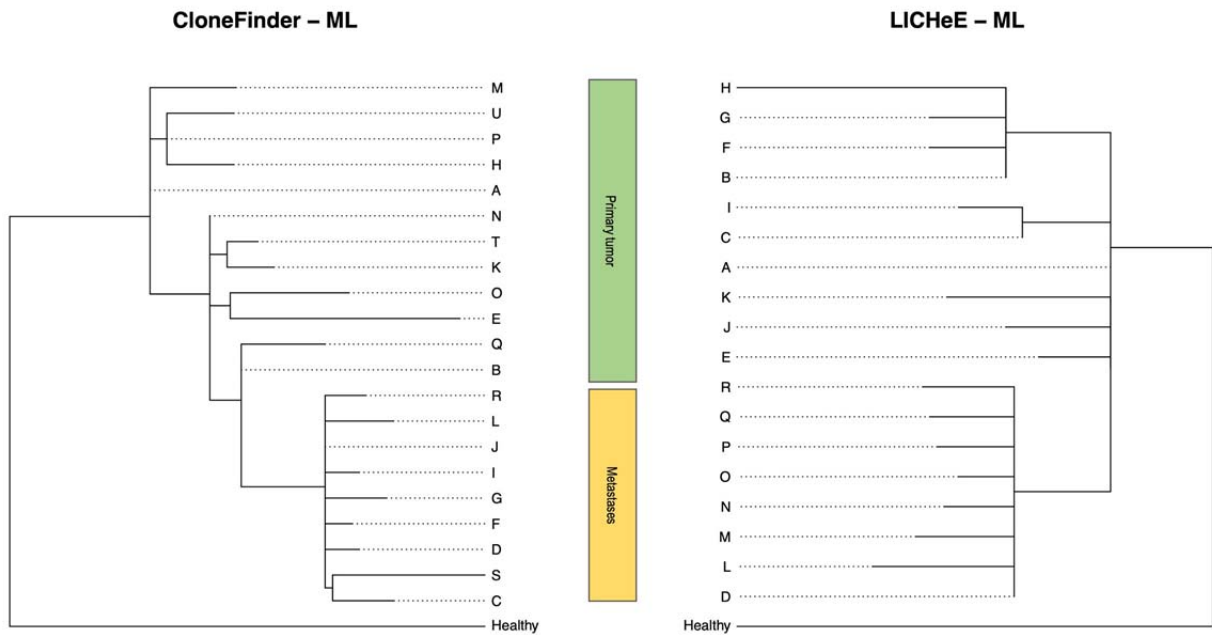

55

56 **Supplementary Figure 3. Phylogenetic reconstruction obtained with CloneFinder and LICHeE.**57 Maximum likelihood trees obtained using heuristic search in PAUP\*<sup>5</sup>. Clonal IDs are shown at  
58 the tips of the phylogenetic trees (A-U for CloneFinder; A-R for LICHeE). Colored rectangles  
59 highlight the anatomical location of each clone: Green - Primary tumor, Yellow - Metastases.

60

61

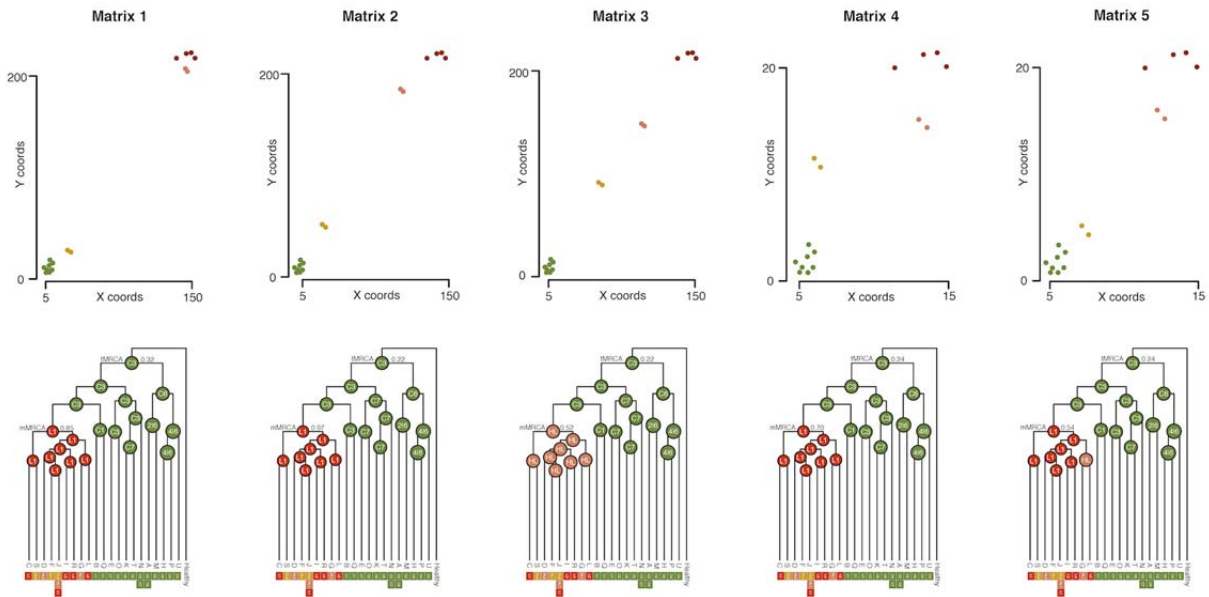

62

63 **Supplementary Figure 4. Spatial organization of bulk tumor samples and biogeographic**

64 **reconstruction. (Top)** 2D coordinate matrices depicting alternative migration tumor samples.

65 Solid circles represent each sample. Colors highlight the anatomical location of each sample:

66 Colon - Green; Colonic Lymph Nodes - Gold; Hepatic Lymph Nodes - Salmon; Liver - Red.

67 **(Bottom)** Biogeographic reconstruction resulting from BayArea using the corresponding 2-D

68 matrix. At two key nodes (tMRCA and mMRCA), the highest posterior probability area range is

69 depicted. Sample IDs are shown at internal nodes. The locations where the extant clones were

70 sampled are shown next to the tips.

71

MP Solution

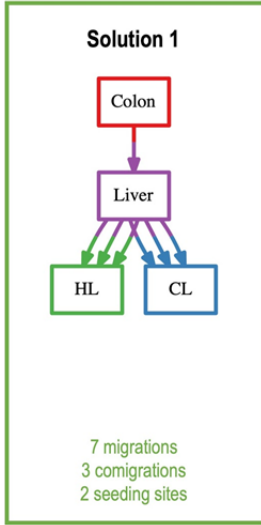

**Solution 2**

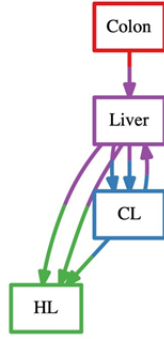

7 migrations  
5 comigrations  
3 seeding sites

**Solution 3**

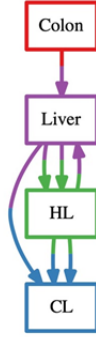

7 migrations  
5 comigrations  
3 seeding sites

**Solution 4**

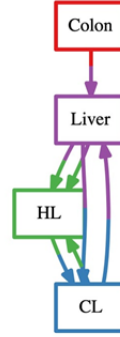

7 migrations  
6 comigrations  
4 seeding sites

**Solution 5**

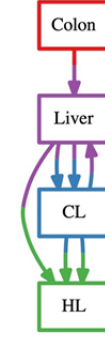

7 migrations  
5 comigrations  
3 seeding sites

72  
73  
74  
75  
76  
77  
78  
79

**Supplementary Figure 5. Parsimonious migration inference with MACHINA.** Migration graphs inferred under *phm\_sankoff* mode and setting the colon as the primary tumor location. Migratory solutions ordered based on the number of inferred migrations and comigrations. Solution 1 is the most parsimonious because it implies the smallest number of events. For each graph, colored squares depict the anatomical sites sampled: Colon - red, CL - blue, HL - green, Liver - purple. Arrows indicate clonal movements.

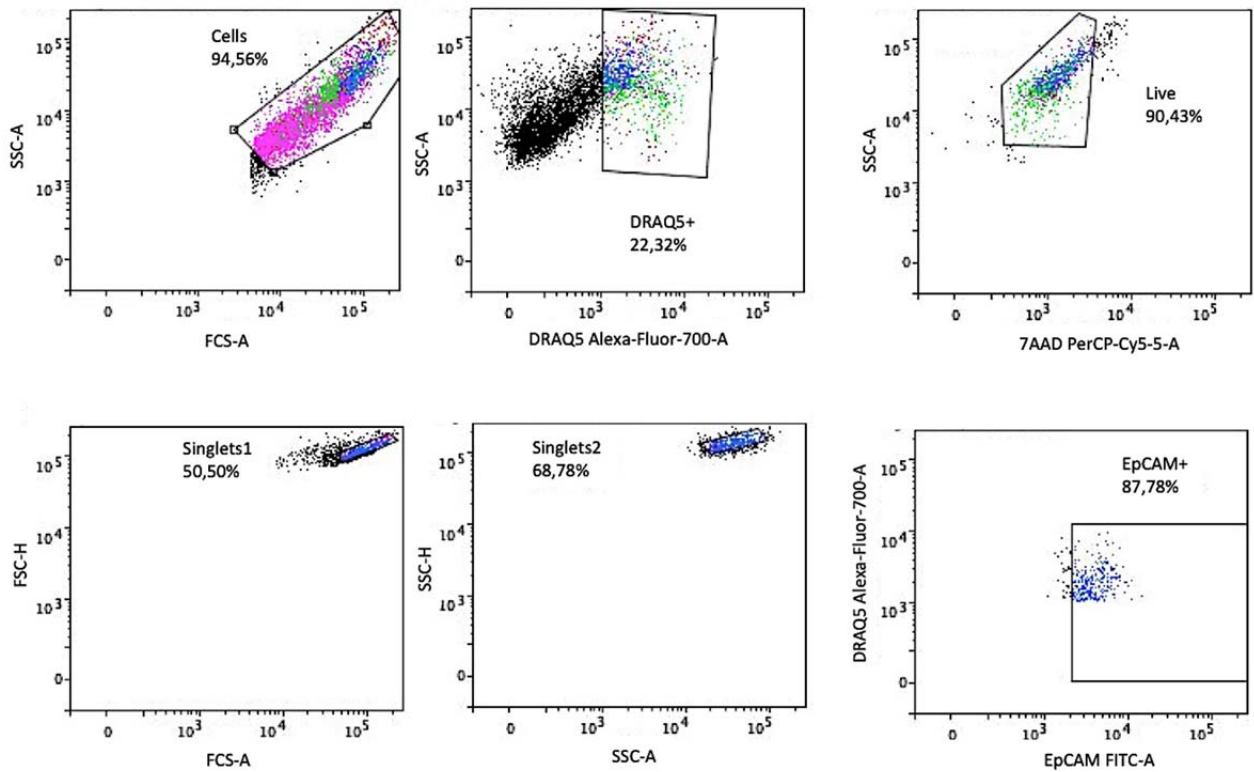

81  
 82 **Supplementary Figure 6. Representative FACS gate strategy showing the frequency of**  
 83 **EpCAM+ cells in sample C8.** We used the scatter gate to remove cell debris, then we gated the  
 84 nucleated cells and select alive ones base on DRAQ5 and 7AAD signals. After that we removed  
 85 aggregates. Finally we gated EpCAM+DRAQ5+7AAD- cells and sorted this population.

86

87

88

89

90

91

92

93

94

95

96

97

98

99



100 **Supplementary Table 1.** Evolutionary models tested in BEAST.

101

| Constant population Size |                    |                                                                       |                              |
|--------------------------|--------------------|-----------------------------------------------------------------------|------------------------------|
| Model Type               | Parameter          | Prior Distribution                                                    | Marginal Likelihood Estimate |
| Strict molecular clock   | Site Model         | Gamma Site Model(GammaCategoryCount=4;GTR)                            | -80049790,70                 |
|                          | Clock Model        | Strict Clock                                                          |                              |
|                          | Tree               | Coalescent Constant Population                                        |                              |
|                          | Clock Rate         | 4.6E-10                                                               |                              |
|                          | Gamma shape        | Exponential(mean=1)                                                   |                              |
|                          | MRCA Prior         | Monophyletic Tumor Clones (Uniform; LowerLimit=0, UpperLimit=4653.75) |                              |
|                          | Effective pop size | 1/X                                                                   |                              |
|                          | MCMC Chains        | 500K                                                                  |                              |
|                          | Sample Trees       | 1000                                                                  |                              |
| Relaxed Exponential      | Site Model         | Gamma Site Model(GammaCategoryCount=4;GTR)                            | -80049737,74                 |
|                          | Clock Model        | Relaxed Clock Exponential                                             |                              |
|                          | Tree               | Coalescent Constant Population                                        |                              |
|                          | ucedMean           | 4.6E-10                                                               |                              |
|                          | Gamma shape        | Exponential(mean=1)                                                   |                              |
|                          | MRCA Prior         | Monophyletic Tumor Clones (Uniform; LowerLimit=0, UpperLimit=4653.75) |                              |
|                          | Effective pop size | 1/X                                                                   |                              |
|                          | MCMC Chains        | 500K                                                                  |                              |
|                          | Sample Trees       | 1000                                                                  |                              |
| Population size change   |                    |                                                                       |                              |
| Model Type               | Parameter          | Prior Distribution                                                    | Marginal Likelihood Estimate |
| Strict molecular clock   | Site Model         | Gamma Site Model(GammaCategoryCount=4;GTR)                            | -80049772,22                 |
|                          | Clock Model        | Strict Clock                                                          |                              |
|                          | Tree               | Coalescent Exponential Population                                     |                              |
|                          | Clock Rate         | 4.6E-10                                                               |                              |
|                          | GrowthRate         | Laplace Distribution                                                  |                              |
|                          | Gamma shape        | Exponential(mean=1)                                                   |                              |
|                          | MRCA Prior         | Monophyletic Tumor Clones (Uniform; LowerLimit=0, UpperLimit=4653.75) |                              |
|                          | Effective pop size | 1/X                                                                   |                              |
|                          | MCMC Chains        | 500K                                                                  |                              |
| Sample Trees             | 1000               |                                                                       |                              |
| Relaxed Exponential      | Site Model         | Gamma Site Model(GammaCategoryCount=4;GTR)                            | -80049726,64                 |
|                          | Clock Model        | Relaxed Clock Exponential                                             |                              |
|                          | Tree               | Coalescent Exponential Population                                     |                              |
|                          | ucedMean           | 4.6E-10                                                               |                              |
|                          | GrowthRate         | Laplace Distribution                                                  |                              |
|                          | Gamma shape        | Exponential(mean=1)                                                   |                              |
|                          | MRCA Prior         | Monophyletic Tumor Clones (Uniform; LowerLimit=0, UpperLimit=4653.75) |                              |
|                          | Effective pop size | 1/X                                                                   |                              |
|                          | MCMC Chains        | 500K                                                                  |                              |
| Sample Trees             | 1000               |                                                                       |                              |

102

103

104 **Supplementary References**

- 105 1. Landis, M. J., Matzke, N. J., Moore, B. R. & Huelsenbeck, J. P. Bayesian analysis of biogeography  
106 when the number of areas is large. *Syst. Biol.* **62**, 789–804 (2013).
- 107 2. El-Kebir, M., Satas, G. & Raphael, B. J. Inferring parsimonious migration histories for metastatic  
108 cancers. *Nat. Genet.* **50**, 718–726 (2018).
- 109 3. Hudson, R. R., Slatkin, M. & Maddison, W. P. Estimation of levels of gene flow from DNA sequence  
110 data. *Genetics* **132**, 583–589 (1992).
- 111 4. Mantel, N. The detection of disease clustering and a generalized regression approach. *Cancer Res.*  
112 **27**, 209–220 (1967).
- 113 5. Cummings, M. P. PAUP\* (Phylogenetic Analysis Using Parsimony (and Other Methods)). *Dictionary*  
114 *of Bioinformatics and Computational Biology* (2004). doi:10.1002/9780471650126.dob0522.pub2

115
