# Supplementary material for: Rapid evolution and biogeographic spread in a colorectal cancer
Source: PubMed Central journal article supplement (PMC6853914; doi:10.1038/s41467-019-12926-8), 2019-11-13
Supplement: 41467_2019_12926_MOESM3_ESM.pdf [file 41467_2019_12926_MOESM3_ESM.pdf]

## **Description of Additional Supplementary Files**

File Name: Supplementary Data 1

Description: Supplementary Data 1 consists of purity estimates and variant allele frequency estimates of the 475 SNVs across all tumor sam
